# Supplementary material
Source: PubMed Central journal article supplement (PMC6248089)
Supplement: jamaoncol-4-1535-s001.pdf [file jamaoncol-4-1535-s001.pdf]

## Supplementary Online Content

Peyton CC, Tang D, Reich RR, et al. Downstaging and survival outcomes associated with neoadjuvant chemotherapy regimens among patients treated with cystectomy for muscle-invasive bladder cancer. *JAMA Oncol*. Published online August 30, 2018. doi:10.1001/jamaoncol.2018.3542

**eTable 1.** Social and Demographic Information by Neoadjuvant Chemotherapy Type

**eTable 2.** Toxicity Summary for ddMVAC According to CTCAE v4.0

**eTable 3.** Full Cox Proportional Hazard Model for Overall Survival Results

This supplementary material has been provided by the authors to give readers additional information about their work.

**eTable 1.** Social and demographic information by neoadjuvant chemotherapy type

| Variable                             | Gem/Cis    | Gem/Carbo      | ddMVAC       | other      | p value | Pairwise comparison GC vs ddMVAC, p value |
|--------------------------------------|------------|----------------|--------------|------------|---------|-------------------------------------------|
| N (%)                                | 204 (61.4) | 32 (9.6)       | 46 (13.9)    | 50 (15.1)  |         |                                           |
| Median age (IQR)                     | 66 (59-72) | 70.5 (63.5-76) | 61.5 (56-68) | 64 (57-72) | 0.02    | 0.002                                     |
| Gender                               |            |                |              |            | 0.19    | 0.80                                      |
| Female                               | 57 (27.9)  | 4 (12.5)       | 12 (26.1)    | 17 (34.0)  |         |                                           |
| Male                                 | 147 (72.1) | 28 (87.5)      | 34 (73.9)    | 33 (66.0)  |         |                                           |
| Race/ethnicity                       |            |                |              |            | 0.01    | 0.12                                      |
| White                                | 195 (95.6) | 27 (84.4)      | 44 (95.7)    | 45 (90)    |         |                                           |
| Black                                | 7 (3.4)    | 5 (15.6)       | 0 (0)        | 3 (6.0)    |         |                                           |
| Other                                | 2 (1.0)    | 0 (0)          | 2 (4.4)      | 2 (4.0)    |         |                                           |
| Hispanic/Latino                      | 3 (1.5)    | 1 (3.3)        | 2 (4.4)      | 2 (4.0)    |         |                                           |
| Marital status                       |            |                |              |            | 0.78    | 0.51                                      |
| Married/living together              | 146 (71.6) | 24 (75.0)      | 32 (69.6)    | 36 (72.0)  |         |                                           |
| Separated/divorced                   | 18 (8.8)   | 1 (3.1)        | 4 (8.7)      | 6 (12.0)   |         |                                           |
| Single never married                 | 22 (10.8)  | 3 (9.4)        | 8 (17.4)     | 4 (8.0)    |         |                                           |
| Widowed                              | 18 (8.8)   | 4 (12.5)       | 2 (4.4)      | 4 (8.0)    |         |                                           |
| Education                            |            |                |              |            | 0.12    | 0.38                                      |
| High School or Less                  | 47 (34.8)  | 8 (42.1)       | 9 (24.3)     | 4 (16.7)   |         |                                           |
| College or Some College              | 55 (40.7)  | 10 (52.6)      | 14 (37.8)    | 15 (62.5)  |         |                                           |
| Graduate/professional degree         | 16 (11.9)  | 1 (5.3)        | 6 (16.2)     | 4 (16.7)   |         |                                           |
| Unknown                              | 17 (12.6)  | 0 (0)          | 8 (21.6)     | 1 (4.2)    |         |                                           |
| Primary insurance                    |            |                |              |            | 0.04    | 0.06                                      |
| Private                              | 63 (30.9)  | 6 (18.8)       | 23 (50.0)    | 14 (28.0)  |         |                                           |
| Medicare                             | 114 (55.9) | 20 (62.5)      | 17 (37.0)    | 27 (54.0)  |         |                                           |
| Medicaid                             | 14 (6.9)   | 1 (3.1)        | 2 (4.4)      | 2 (4.0)    |         |                                           |
| Self-pay/uninsured                   | 8 (3.9)    | 1 (3.1)        | 1 (2.2)      | 1 (2.0)    |         |                                           |
| Other                                | 5 (2.5)    | 4 (12.5)       | 3 (6.5)      | 6 (12.0)   |         |                                           |
| Elixhauser comorbidity, median (IQR) | 3 (2-5)    | 4 (2.5-6.5)    | 3 (1-5)      | 4 (3-6)    | 0.03    | 0.05                                      |
| Histology                            |            |                |              |            | 0.005   | 0.33                                      |
| Urothelial carcinoma                 | 141 (69)   | 25 (78)        | 27 (59)      | 36 (72)    |         |                                           |
| Squamous cell carcinoma              | 1 (1)      | 2 (6)          | 0            | 3 (6)      |         |                                           |
| Adenocarcinoma                       | 0          | 0              | 0            | 1 (2)      |         |                                           |
| Other                                | 62 (30)    | 5 (16)         | 19 (41)      | 10 (20)    |         |                                           |

| Variable                      | Gem/Cis     | Gem/Carbo   | ddMVAC      | other       | p value | Pairwise comparison GC vs ddMVAC, p value |
|-------------------------------|-------------|-------------|-------------|-------------|---------|-------------------------------------------|
| <b>Clinical Stage</b>         |             |             |             |             |         |                                           |
| ≤ cT1* NxMx                   | 2 (1)       | 1 (3)       | 0           | 8 (16)      | <0.001  | 0.44                                      |
| cT2 NxMx                      | 146 (72)    | 20 (63)     | 36 (78)     | 26 (52)     |         |                                           |
| cT3 NxMx                      | 40 (20)     | 7 (22)      | 5 (11)      | 9 (18)      |         |                                           |
| cT4 NxMx                      | 16 (8)      | 4 (13)      | 5 (11)      | 6 (12)      |         |                                           |
| Unknown                       |             |             |             | 1 (2)       |         |                                           |
| <b>Pathologic AJCC Stage</b>  |             |             |             |             | 0.02    | 0.16                                      |
| Stage 0 a/is (Ta/isN0M0)      | 50 (24.5)   | 3 (9.38)    | 19 (41.3)   | 12 (24)     |         |                                           |
| Stage I (T1N0M0)              | 28 (13.7)   | 1 (3.13)    | 7 (15.2)    | 7 (14)      |         |                                           |
| Stage II (T2N0M0)             | 20 (9.8)    | 3 (9.38)    | 4 (8.7)     | 9 (18)      |         |                                           |
| Stage III (T3N0M0)            | 42 (20.6)   | 11 (34.38)  | 9 (19.6)    | 7 (14)      |         |                                           |
| Stage IV (T4N0-3M0-1)         | 64 (31.4)   | 14 (43.75)  | 7 (15.2)    | 15 (30)     |         |                                           |
| Unknown                       |             |             |             |             |         |                                           |
| <b>Cycles of chemotherapy</b> |             |             |             |             |         |                                           |
| Mean ± SD                     | 3.72 (2.19) | 4.44 (3.57) | 3.27 (0.86) | 3.96 (2.13) | <0.001  | <0.03                                     |
| Counts, N (%)                 |             |             |             |             |         |                                           |
| < 3 cycles                    | 52 (26.3)   | 9 (28.1)    | 3 (6.5)     | 14 (29.2)   | 0.02    | <0.001                                    |
| 3-4 cycles                    | 96 (48.5)   | 13 (40.6)   | 39 (85)     | 19 (39.6)   |         |                                           |
| > 4 cycles                    | 50 (25.3)   | 10 (31.3)   | 3 (6.5)     | 15 (31.3)   |         |                                           |

\* cT1 based on transurethral resection with radiographic or clinical evidence of invasive/advanced disease

**eTable 2.** Toxicity summary for ddMVAC according to CTCAE v4.0

| Adverse Events                                                          | Grades 1 to 2,<br>No. (%) | Grade 3,<br>No. (%) |
|-------------------------------------------------------------------------|---------------------------|---------------------|
| Hematologic                                                             |                           |                     |
| Anemia                                                                  | 13 (28)                   | 3 (7)               |
| Thrombocytopenia                                                        | 15 (33)                   |                     |
| Neutropenia                                                             |                           | 1 (2)               |
| Acute Kidney Injury                                                     | 3 (7)                     |                     |
| Gastrointestinal disorders                                              |                           |                     |
| Mucositis                                                               | 4 (9)                     | 1 (2)               |
| Nausea/vomiting                                                         | 17 (37)                   |                     |
| Diarrhea                                                                | 1 (2)                     |                     |
| Reflux                                                                  | 6 (13)                    |                     |
| Esophagitis                                                             |                           | 1 (2)               |
| Respiratory                                                             |                           | 1 (2)               |
| Metabolism and nutrition disorders                                      |                           | 2 (4)               |
| Neuropathy                                                              | 3 (7)                     |                     |
| Urinary tract infection                                                 | 3 (7)                     | 2 (4)               |
| General disorders and administration site conditions                    |                           |                     |
| Phlebitis or Cellulitis                                                 | 6 (13)                    |                     |
| Alopecia                                                                | 4 (9)                     |                     |
| Fever                                                                   | 2 (4)                     | 1 (2)               |
| Fatigue                                                                 | 26 (57)                   | 1 (2)               |
| Lower extremity edema                                                   | 1 (2)                     |                     |
| Cough or hiccups                                                        | 1 (2)                     |                     |
| Insomnia                                                                | 1 (2)                     |                     |
| Tinnitus                                                                | 2 (4)                     |                     |
| Thromboembolic event                                                    | 2 (4)                     | 2 (4)               |
| CTCAE v4.0, Common Terminology Criteria for Adverse Events version 4.0. |                           |                     |

**eTable 3.** Full Cox proportional hazard model for overall survival results

| <b>Variable</b>      | <b>HR</b> | <b>95% CI</b> | <b>P value</b> |
|----------------------|-----------|---------------|----------------|
| Age                  | 0.99      | 0.97-1.01     | 0.31           |
| Comorbidity          | 1.06      | 0.97-1.16     | 0.18           |
| Gender               | 0.63      | 0.39-1.00     | 0.05           |
| Clinical stage       |           |               |                |
| cT2                  | 1.52      | 0.58-4.00     | 0.39           |
| cT3                  | 3.27      | 1.20-8.89     | 0.02           |
| cT4                  | 3.37      | 1.15-9.86     | 0.03           |
| Chemotherapy regimen |           |               |                |
| ddMVAC               | 0.43      | 0.17-1.06     | 0.07           |
| Gem/Carbo            | 2.00      | 1.16-3.45     | 0.01           |
| Other                | 1.72      | 1.05-2.80     | 0.03           |
| Cycles of NAC        | 1.02      | 0.94-1.10     | 0.66           |
